# Supplementary material for: Splitting-induced surface patterns on the surface of polystyrene thin films
Source: Royal Society of Chemistry journal article supplement (doi:10.1039/c6ra21890c), 2016-01-01
Supplement: c6ra21890c1.pdf [file c6ra21890c1.pdf]

## Supplementary Information

### Splitting-induced surface patterns on surface of polystyrene thin films

Ang-Ying Lin <sup>1)</sup>, Fuqian Yang <sup>2)</sup>, and Sanboh Lee <sup>1)</sup>

1) Department of Materials Science and Engineering  
National Tsing Hua University, Hsinchu 300, Taiwan

2) Department of Chemical and Materials Engineering  
University of Kentucky, Lexington, KY 40506

Figure S1. XPS spectra of PS films after subjected to UV irradiation of different doses: (a) C 1s, and (b) O 1s

Figure S2. Optical images of the surface gratings formed on the surface of the PS films (nominal  $M_w=2300$  g/mol) without UV irradiation; for tension-splitting of a sandwiched specimen, (a) surface gratings on one substrate, and (b) surface gratings on the other substrate; for peeling-splitting of a sandwiched specimen, (c) surface gratings on one substrate, and (d) surface gratings on the other substrate (the arrows show the insertion direction,  $h$  is the film thickness)

Figure S3. AFM images of the surface gratings formed on the surface of the PS films ( $M_w=2300$  g/mol) without UV irradiation; (a) surface gratings on a PS film of initial thickness of 362 nm by the tension-splitting method, and (b) surface gratings on a PS film of initial thickness of 277 nm by the peeling-splitting method (the arrows show the insertion direction,  $h$  is the film thickness)

Figure S4. AFM images of the surface gratings formed on the surface of the irradiated PS films with the irradiation dose of  $1.548 \text{ J/cm}^2$ ; (a) surface gratings on a PS film of the thickness of 271 nm by the tension-splitting method, and (b) surface gratings on a PS film of the thickness of 265 nm by the peeling-splitting method (the arrows show the insertion direction,  $h$  is the film thickness)

Figure S5. Gel permeation chromatograms of the received PS pellets ( $M_w$ : 250,000 g/mol) and the PS made from the fractional precipitation method

Figure S6. AFM images and line scans of the surface gratings formed on the PS films with  $T_g$  being: (a)  $69.8^\circ\text{C}$  (as-received PS), and (b)  $103.2^\circ\text{C}$  (PS made from fractional precipitation) (The arrow represents the insertion direction.)

Figure S7. Optical images of the same spot of the surface gratings formed on the surface of a photoresist film: (a) without the removal of the PS in the surface gratings, and (b) after the removal of the PS in the surface gratings (thickness of PMMA film: 499 nm)

Figure S8. AFM images of the surface gratings of single polymer made from the bilayer-sandwiched structures: (a) PS, and (b) photoresist ( $h$ : film thickness)

Figure S9. Variation of the amplitude of the surface gratings with film thickness for the surface gratings made solely of either PS or photoresist and from the bilayer-sandwiched structures (the film thickness is the thickness of pure PS or photoresist film.)

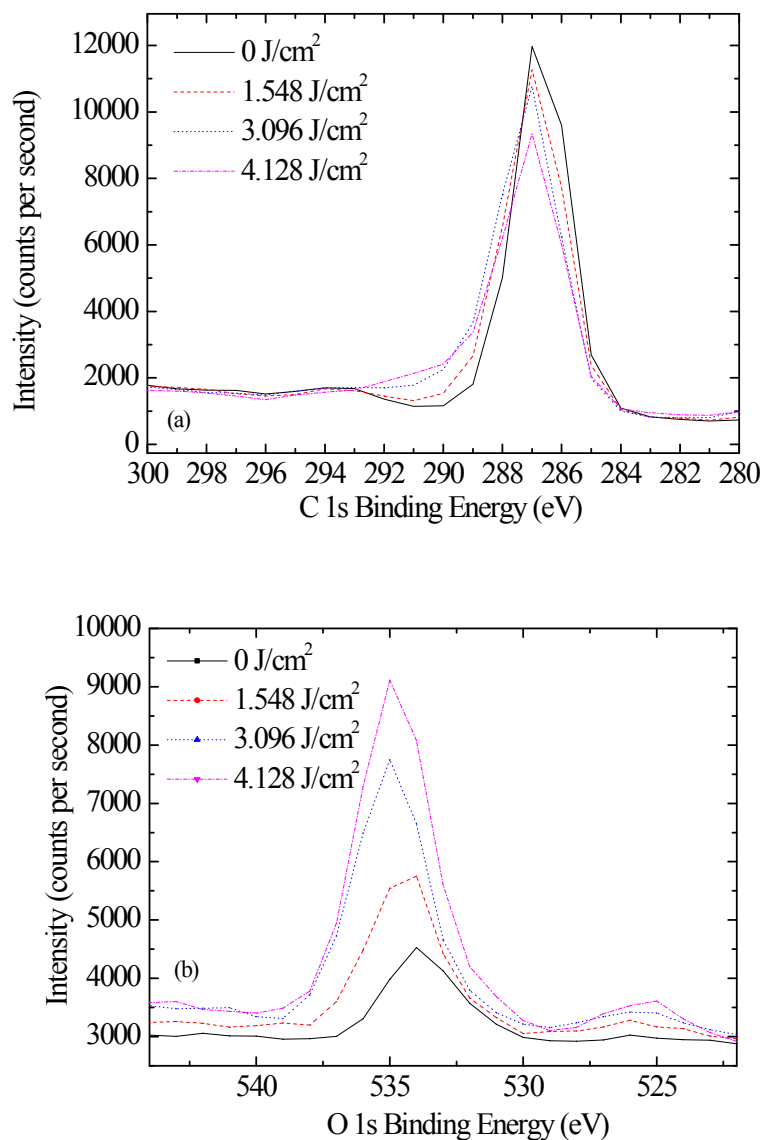

Figure S1. XPS spectra of PS films after subjected to UV irradiation of different doses: (a) C 1s, and (b) O 1s

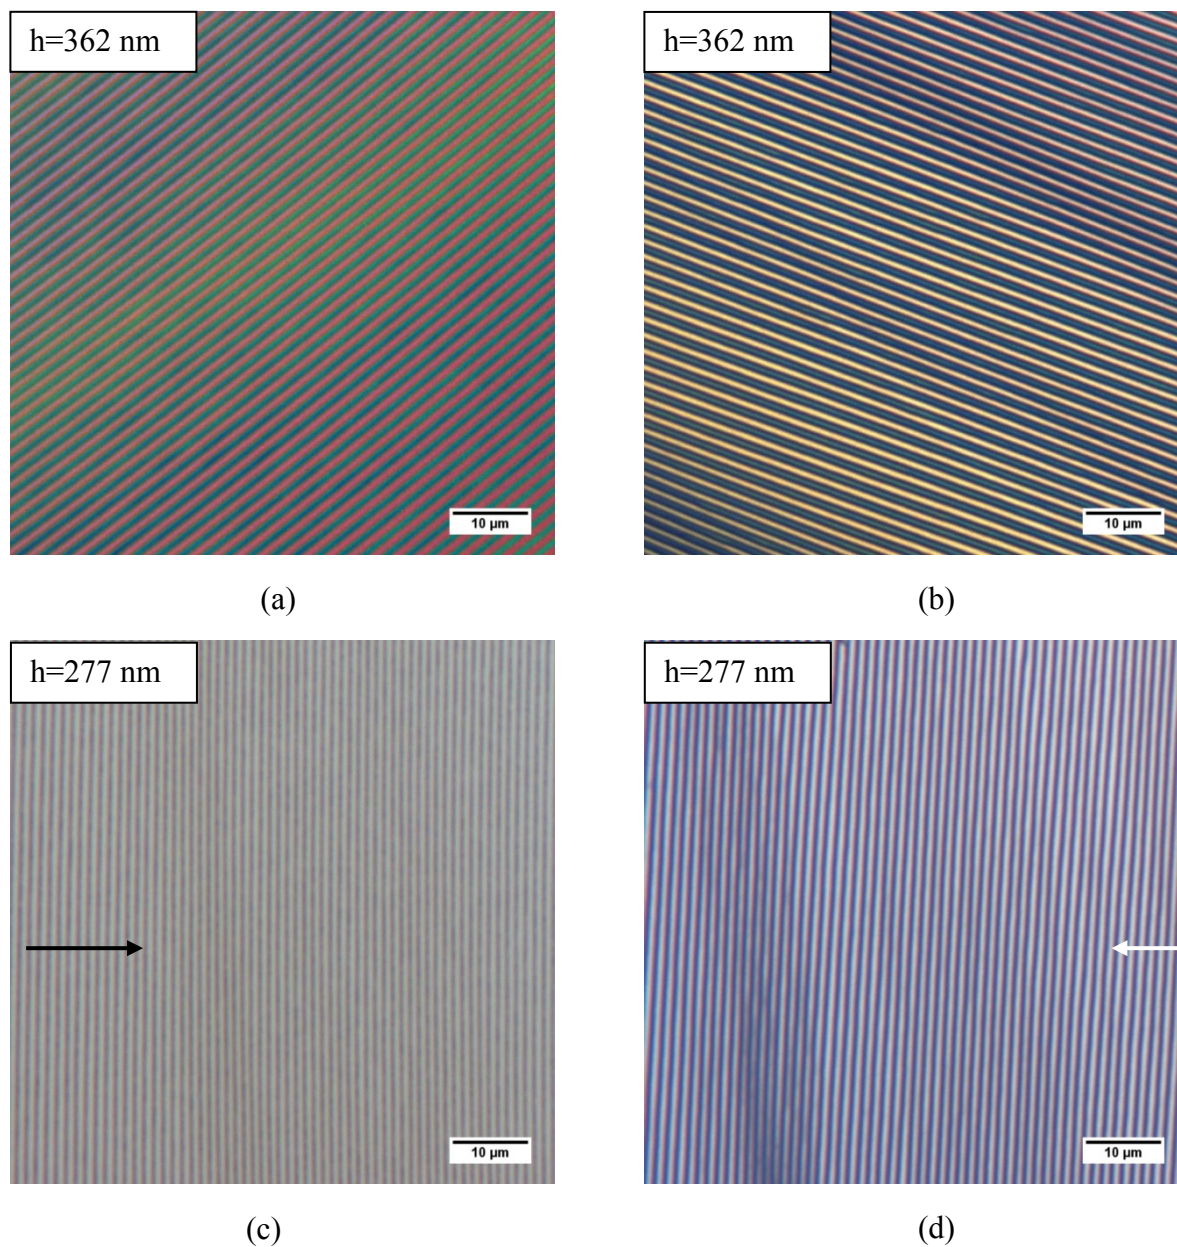

Figure S2. Optical images of the surface gratings formed on the surface of the PS films (nominal  $M_w=2300$  g/mol) without UV irradiation; for tension-splitting of a sandwiched specimen, (a) surface gratings on one substrate, and (b) surface gratings on the other substrate; for peeling-splitting of a sandwiched specimen, (c) surface gratings on one substrate, and (d) surface gratings on the other substrate (the arrows show the insertion direction,  $h$  is the film thickness)

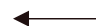



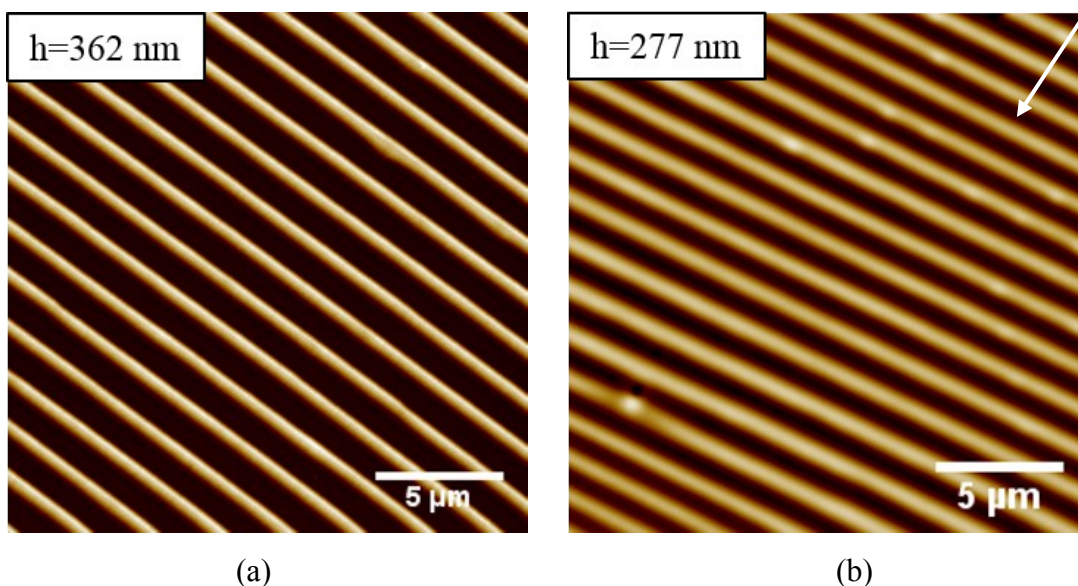

Figure S3. AFM images of the surface gratings formed on the surface of the PS films ( $M_w=2300$  g/mol) without UV irradiation; (a) surface gratings on a PS film of initial thickness of 362 nm by the tension-splitting method, and (b) surface gratings on a PS film of initial thickness of 277 nm by the peeling-splitting method (the arrows show the insertion direction,  $h$  is the film thickness)

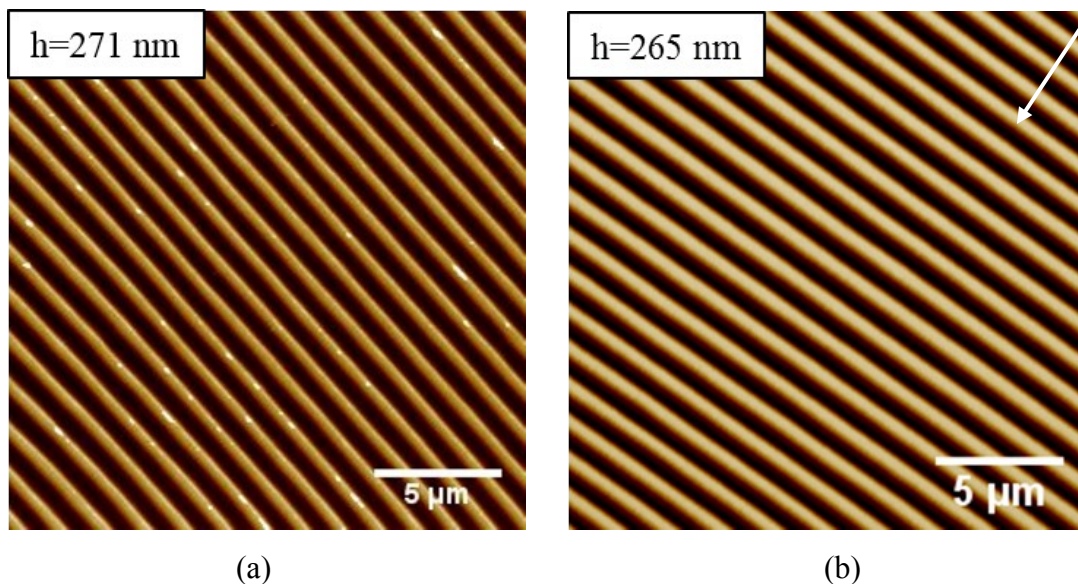

Figure S4. AFM images of the surface gratings formed on the surface of the irradiated PS films with the irradiation dose of  $1.548 \text{ J/cm}^2$ ; (a) surface gratings on a PS film of the thickness of 271 nm by the tension-splitting method, and (b) surface gratings on a PS film of the thickness of 265 nm by the peeling-splitting method (the arrows show the insertion direction,  $h$  is the film thickness)

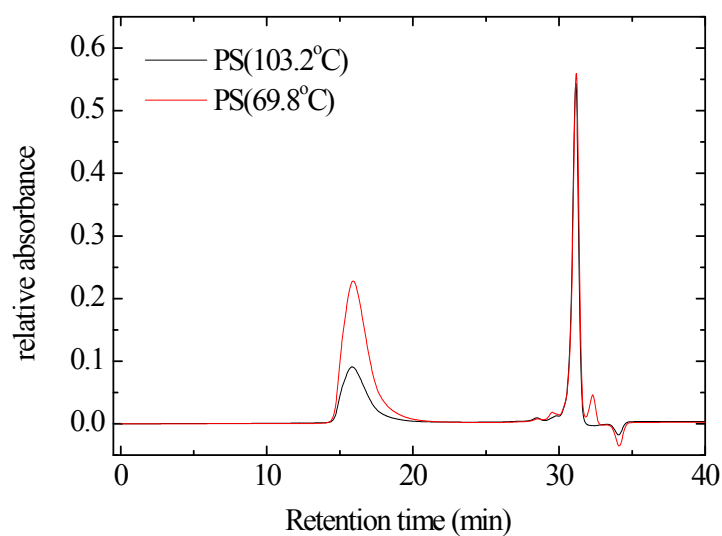

Figure S5. Gel permeation chromatograms of the received PS pellets ( $M_w$ : 250,000 g/mol) and the PS made from the fractional precipitation method

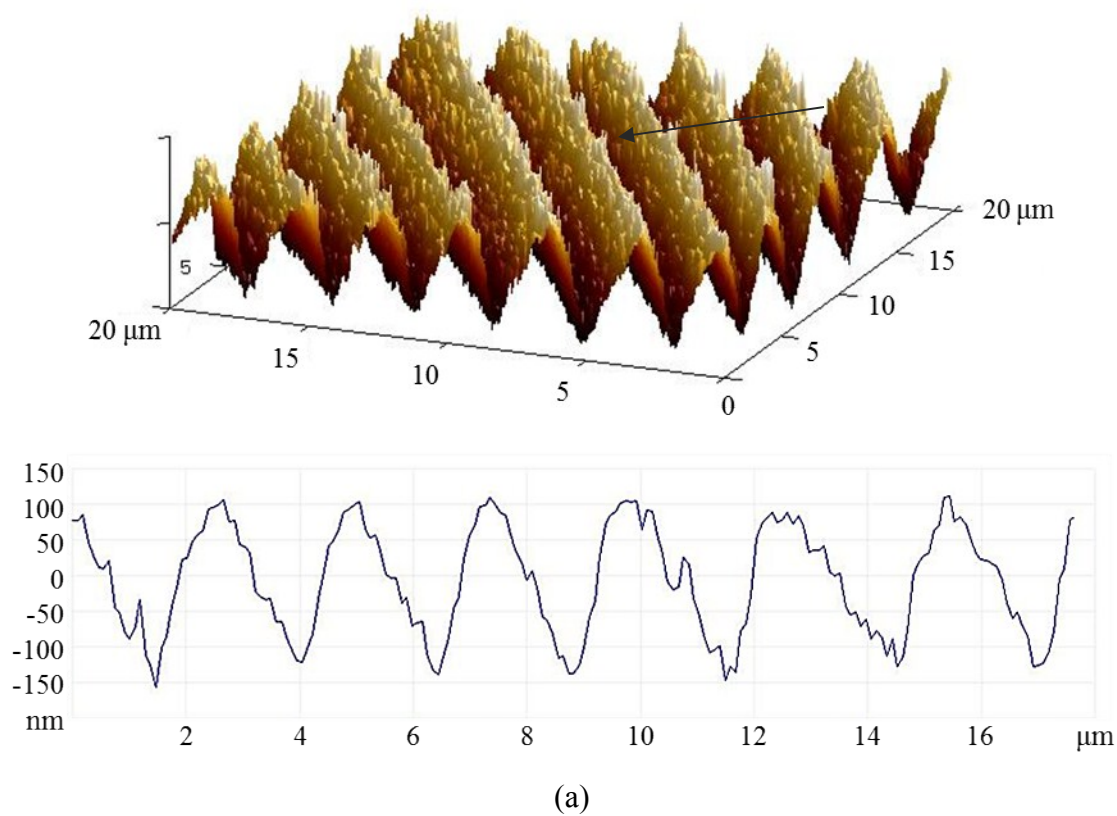

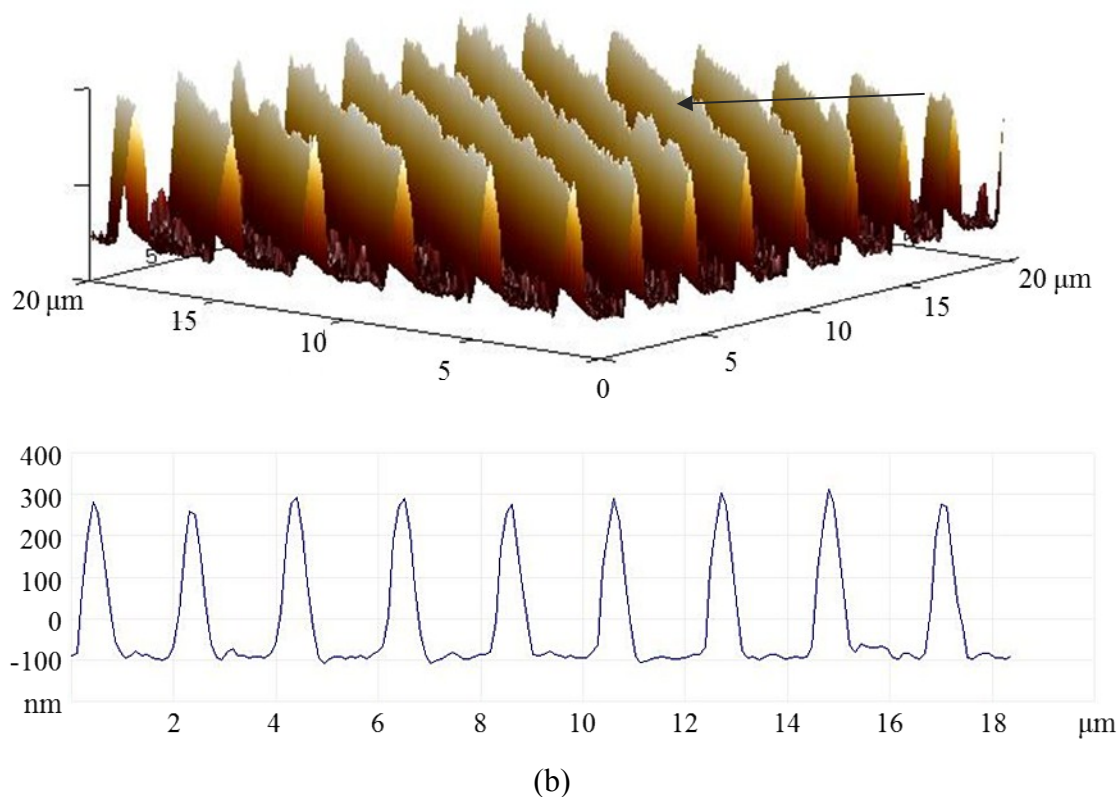

Figure S6. AFM images and line scans of the surface gratings formed on the PS films with  $T_g$  being: (a) 69.8°C (as-received PS), and (b) 103.2 °C (PS made from fractional precipitation) (The arrow represents the insertion direction.)

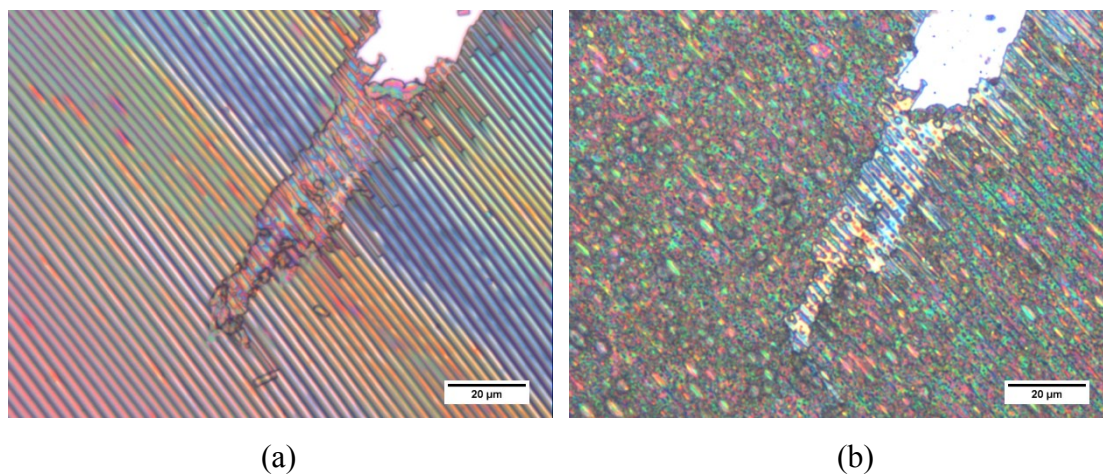

Figure S7. Optical images of the same spot of the surface gratings formed on the surface of a photoresist film: (a) without the removal of the PS in the surface gratings, and (b) after the removal of the PS in the surface gratings (thickness of PMMA film: 499 nm)



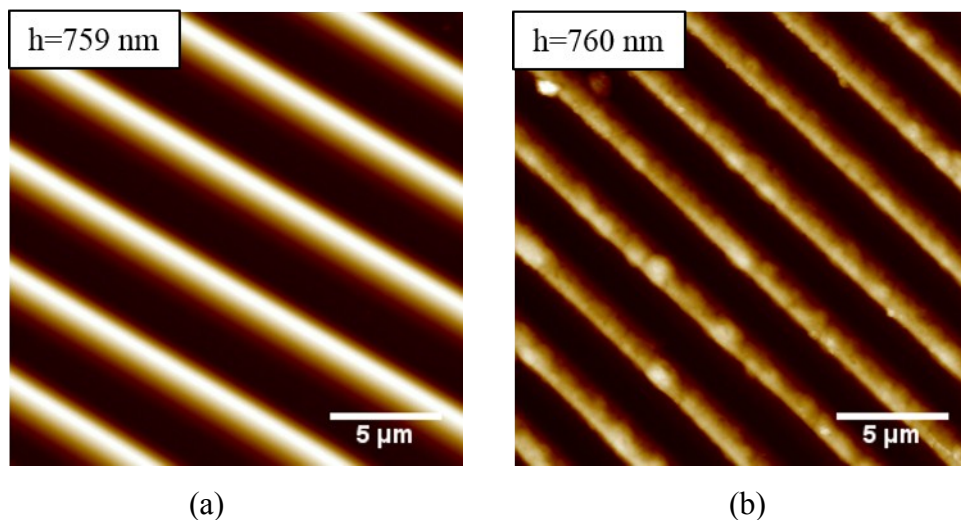

Figure S8. AFM images of the surface gratings of single polymer made from the bilayer-sandwiched structures: (a) PS, and (b) photoresist ( $h$ : film thickness)

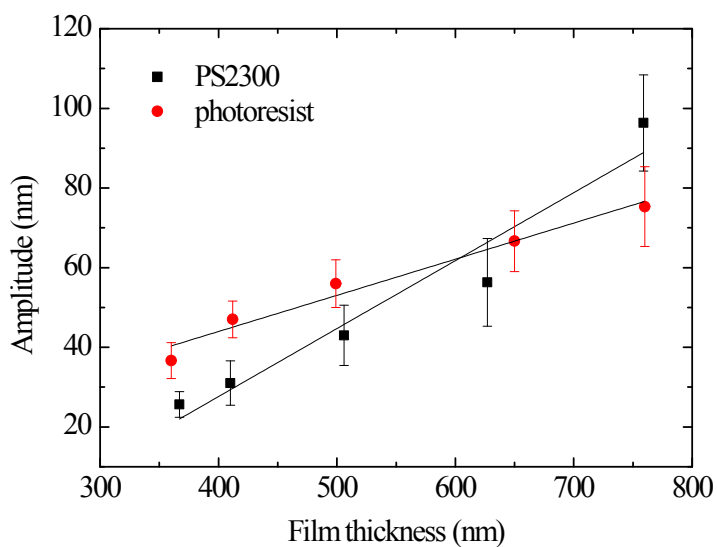

Figure S9. Variation of the amplitude of the surface gratings with film thickness for the surface gratings made solely of either PS or photoresist and from the bilayer-sandwiched structures (the film thickness is the thickness of pure PS or photoresist film.)
